# Supplementary material
Source: MDPI journal article supplement (https://www.mdpi.com/2673-4591/56/1/42)
Supplement: s1 [file s1]

# Rheological and Microstructural Characteristics of Commercial Mayonnaise-Type Emulsions: A Chemometric Analysis <sup>†</sup>

Sergey Gubsky <sup>1,\*</sup> and Anastasiia Sachko <sup>2</sup>

<sup>1</sup> Department of Chemistry, Biochemistry, Microbiology and Hygiene of Nutrition, State Biotechnological University, 61051 Kharkiv, Ukraine

<sup>2</sup> Department of Chemistry and Food Analysis, Yuriy Fedkovych Chernivtsi National University, 58002 Chernivtsi, Ukraine; an.sachko@chnu.edu.ua

\* Correspondence: sergey.m.gubsky@biotechuniv.edu.ua

<sup>†</sup> Presented at the 4th International Electronic Conference on Applied Sciences, 27 October–10 November 2023; Available online: <https://asec2023.sciforum.net/>.

**Table S1.** Descriptive characteristics of samples\*.

| Sample | Oil content | Oil type  | Emulsifier/Stabilizer/Thickener** | Acidity agent*** | Trade mark | Country's manufacturer |
|--------|-------------|-----------|-----------------------------------|------------------|------------|------------------------|
| K25    | 25          | Sunflower | EYP/XG,GG/MS                      | LA,AA            | Kuner      | Austria                |
| T28    | 28          | Sunflower | MS/XG/MS                          | LA,AA            | Torchin    | Ukraine                |
| S30    | 30          | Sunflower | MS/ XG,GG/MS                      | LA,AA            | Schedro    | Ukraine                |
| O40    | 40          | Sunflower | MS/ XG,GG/MS                      | CA,AA            | Olis       | Ukraine                |
| Y41    | 41          | Olive     | EYP/LBG,P/MS                      | LA               | Yabarra    | Spain                  |
| S50    | 50          | Sunflower | EYP/XG,GG/MS                      | LA,AA            | Schedro    | Ukraine                |
| T50    | 50          | Sunflower | EYP/XG/MS                         | LA,AA            | Torchin    | Ukraine                |
| K50    | 50          | Sunflower | EYP/-/MS                          | LA,AA            | Kuner      | Austria                |
| L67    | 67          | Sunflower | EYP/XG/-                          | LA,AA            | Oikom      | Ukraine                |
| T72    | 72          | Sunflower | EYP/XG/MS                         | LA,AA            | Torchin    | Ukraine                |
| N76    | 76          | Canola    | EYP/XG,GG/MS                      | CA               | Kania      | Poland                 |

\* The main ingredients of mayonnaises are identified according to the information on the sample label and their functional use in the formulation is presented

\*\*XG , GG and LBG are xanthan, guar and locust bean gums; MS is modified corn or potato starch's; EYP is egg yolk products; P is pectin

\*\*\*LA, CA and AA are lactic, citric and acetic acids

**Table S2.** Principal component factor analysis: factor loading\*.

| Variable                                | Factor 1       | Factor 2     | Factor 3     | Factor 4 |
|-----------------------------------------|----------------|--------------|--------------|----------|
| Oil content                             | 0.121          | <u>0.899</u> | 0.150        | 0.023    |
| pH                                      | −0.646         | −0.192       | 0.298        | −0.415   |
| Acidity                                 | −0.546         | 0.073        | −0.686       | −0.257   |
| Aggregation degree $\tau_c$             | <u>0.888</u>   | 0.096        | 0.076        | 0.123    |
| Structure looseness $\chi$              | 0.282          | <u>0.796</u> | −0.130       | −0.336   |
| Casson's viscosity coefficient $\eta_c$ | −0.681         | 0.354        | 0.254        | −0.323   |
| Static yield stress                     | 0.412          | −0.144       | <u>0.804</u> | −0.368   |
| Volume mean diameter $D_{43}$           | − <u>0.709</u> | −0.119       | 0.403        | 0.410    |
| SPAN                                    | 0.453          | −0.631       | −0.228       | −0.451   |
| Variance                                | 2.9402         | 2.0520       | 1.5306       | 0.9785   |
| % Variance                              | 32.7           | 22.8         | 17.0         | 10.9     |

\* Loading factors exceeding 0.7 are highlighted by underlining

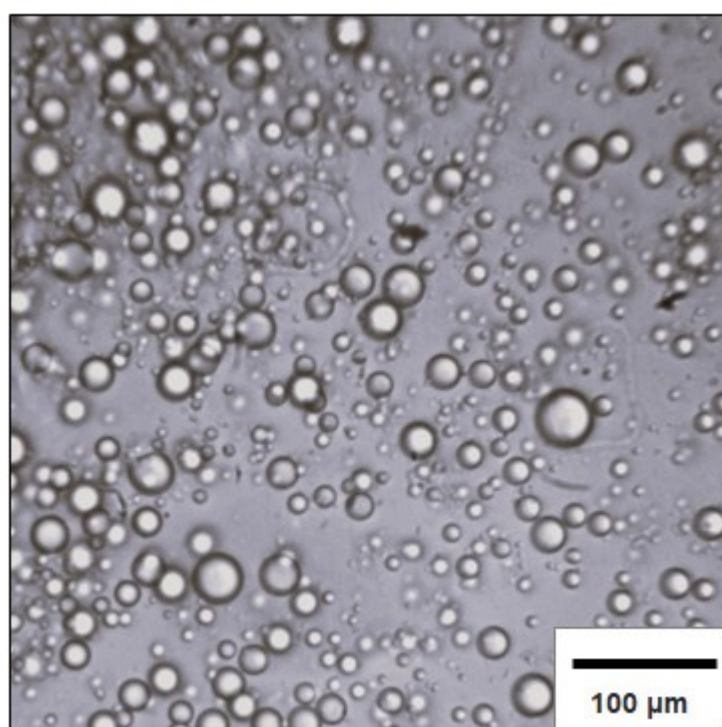

**Figure S1.** Microphotograph of the structure of a sample of T28 mayonnaise with spherical drops of various sizes and flocculants as agglomeration of droplets.

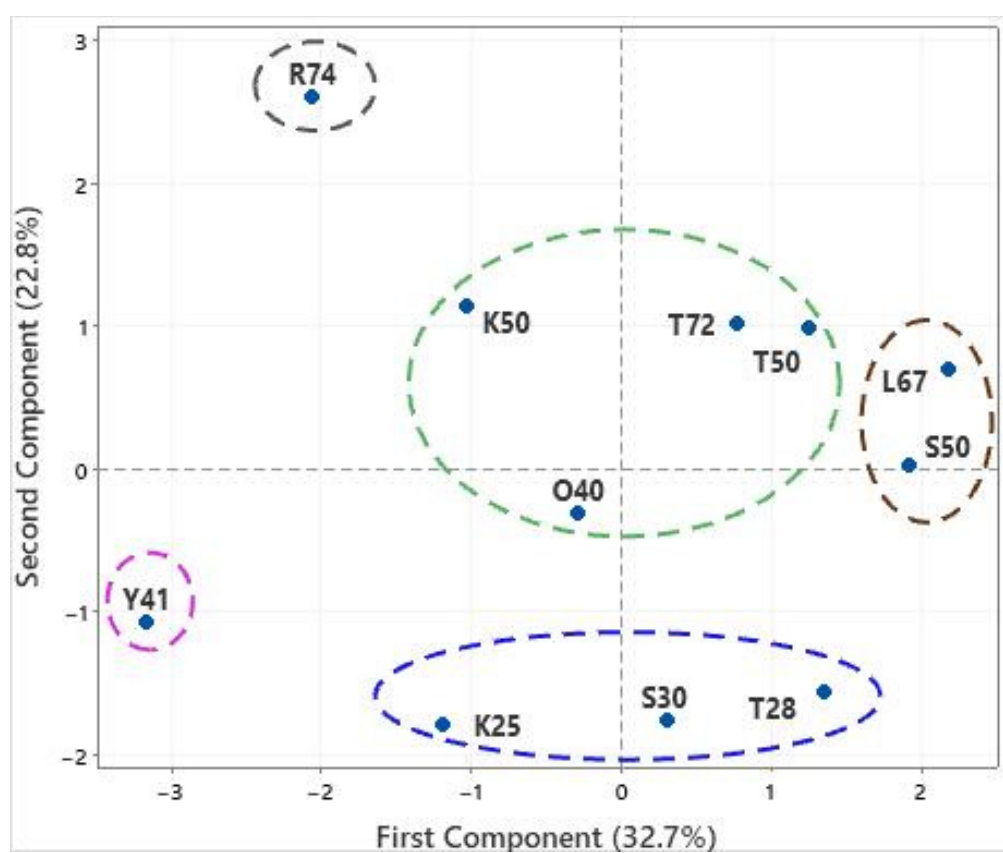

**Figure S2.** Principal component analysis: scope of samples and suspected clusters.
